# Supplementary material for: Rapid Sorting of Fucoxanthin-Producing Phaeodactylum tricornutum Mutants by Flow Cytometry
Source: MDPI journal article supplement (doi:10.3390/md19040228), 2021-04-17
Supplement: s1 [file s1]

# Supplementary Data

## Rapid Sorting of Fucoxanthin-Producing *Phaeodactylum tricornutum* Mutants by Flow Cytometry

Yong Fan <sup>1,2,3,4†</sup>, Xiao-Ting Ding <sup>1,3,4†</sup>, Li-Juan Wang <sup>1</sup>, Er-Ying Jiang <sup>1,3,4</sup>, Phung Nghi Van <sup>1,3,4</sup>  
and Fu-Li Li <sup>1,,3,4\*</sup>

<sup>1</sup> Key Laboratory of Biofuels, Shandong Provincial Key Laboratory of Synthetic Biology, Qingdao Institute of Bioenergy and Bioprocess Technology, Chinese Academy of Sciences, Qingdao 266101, China;  
fanyong@qibebt.ac.cn (Y.F.); dingxt@qibebt.ac.cn (X.-T.D.); sunlibin@xiaotech.com (L.-J.W.); jiangey@qibebt.ac.cn (E.-Y.J.); van@qibebt.ac.cn (P.N.V.)

<sup>2</sup> University of Chinese Academy of Sciences, Beijing 100049, China;

<sup>3</sup> Shandong Energy Institute, Qingdao 266101, China;

<sup>4</sup> Qingdao New Energy Shandong Laboratory, Qingdao 266101, China

\* Correspondence: lifl@qibebt.ac.cn; Tel.: +86-532-80662655

† These authors have contributed equally to this work.

## Supplementary Figure

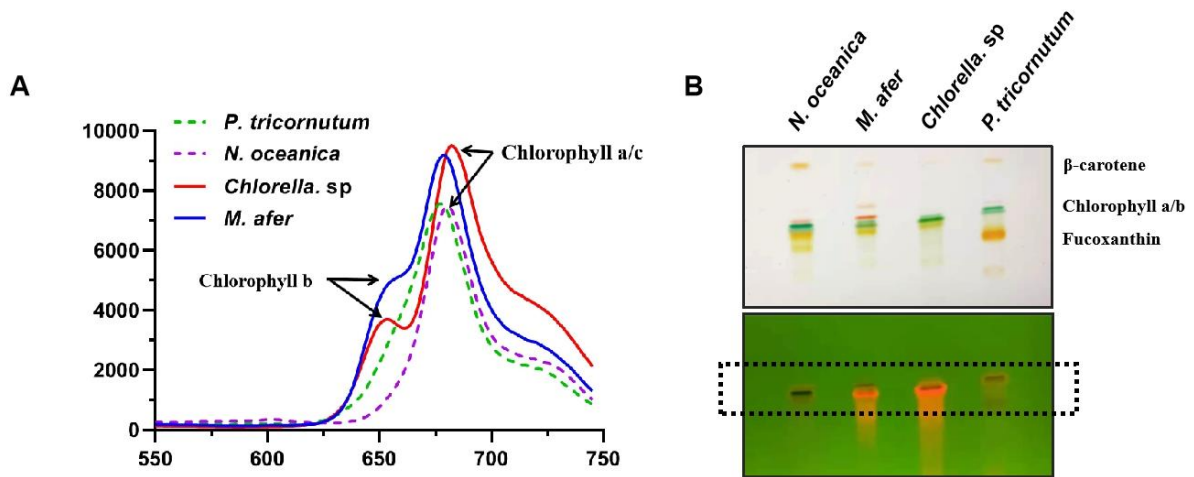

Figure S1. A. Fluorescence spectral scanning curves of four species of microalgae pigment extracts. All pigments were extracted using the same concentration of algal culture. The excitation wavelength is 488 nm. B. The pigment extracts of four microalgae were separated using TLC. The chlorophylls and carotenoids of the four microalgae were different. Blue light of 440-485 nm was used for fluorescence observation, and the samples containing chlorophyll a & b were shown strong visible red fluorescence, and the samples containing only chlorophyll a had only weak visible red fluorescence.

## Supplementary data

A single-cell microalgae was screened from natural water in Qingdao near our laboratory (The microscopic pictures are shown below). We identified by sequencing 18S. the primers are 18S-F: 5'-AACCTGGTTATCCTGCCAGT-3'; 18S R 5'-ATCCTTCTGCAGGTTACCTAC-3'. after sequencing and Blast, the result shown as below. We consider it a strain of *Chlorella* sp.

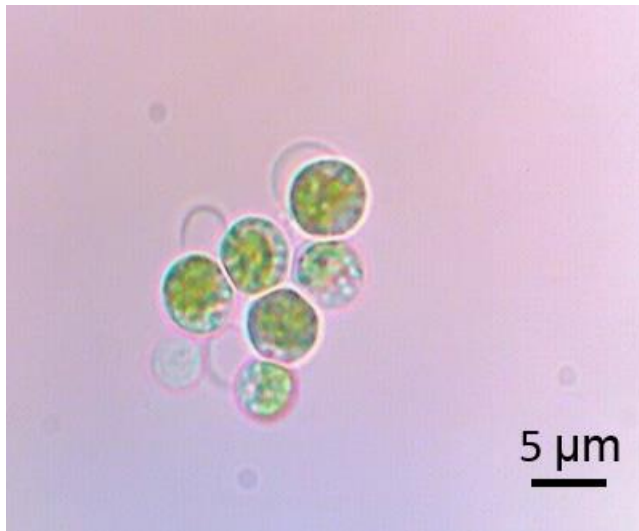

### >Seq

```
AGTCAACGACTTCTCTTCTAGGTGGGAGGGTTAATGAACTTCTCGGCGGCCGAGAGCGGAGACCGCACCCGGTCGCCAATCC
GAACACTTCACCAGCACACCAATCGGTAGGAGCGACGGGCGGTGTGTACAAAGGGCAGGGACGTAATCAACGCAAGCTGATGAC
TTGCGCTTACTAGGCATTCTCGTTGAAGATTAATAATTGCAATAATCTATCCCCATCACGATGCAGTTTCAAAGATTACCCGGGCTCT
CGGCCAAGGCTAGGCTCGTTGAATGCATCAGTGTAGCGCGCGTGGCGCCAGAACATCTAAGGGCATCACAGACCTGTTATTGCCTC
ATGCTTCCATTGGCTAGTCGCCAATAGTCCCTCTAAGAAGTCCGCCGGCTGGCGAGCCAACCGTGAATTTAGCAGGCTGAGGTCTC
GTTTCGTTACCGGAATCAACCTGACAAGGCAACCCACCACTAAGAACGGCCATGCACCACCACCCATAGAATCAAGAAAGAGCTCTC
AATCTGTCAATCCTCACTATGTCTGGACCTGGTAAGTTTTCCCGTGTGTAGTCAAATTAAGCCGCAGGCTCCACGCCTGGTGGTGCCC
TTCCGTCATTCCTTTAAGTTTCAGCCTTGCAGCATACTCCCCCGGAACCCAAAACTTTGATTTCTCATAAGGTGCCGGCGGAGT
CATCGAAGAAACATCCGCCGATCCCTAGTCGGCATCGTTTATGGTTGAGACTAGGACGGTATCTAATCGTCTTCGAGCCCCCACTTTC
GTTCTTGATTAATGAAAACATCCTTGGCAAATGCTTTCGCAGTAGTTCGTCTTTCATAAATCCAAGAATTTACCTCTGACAATGAAATA
CGAATGCCCCCGACTGTCCCTCTTAATCATTACTCCGGTCTACAGACCAACAGGATAGGCCAGAGTCTATCGTGTATTCCATGCTAA
TGTAATCAGAGCGTAGGCCTGCTTGAACACTCTAATTTACTCAAAGTAACAGCGCCGACTCCGAGTCCCGGACAGTGAAGCCCAGG
AGCCCGTCCCCGGCAACAAGGTGGGCCCTGCCAGTGACACCGAAACGGCGGACCGGCAGGCCCCACCCGAAATCCAACCTACGAG
CTTTTAACTGCAGCAACTTAAATATACGCTATTGGAGCTGGAATTACCGCGGTGCTGGCACCAGACTTGCCTCCAATTGATCCTCG
TTAAGGGGTTTAGATTGTACTCATTCCAATTACCAGACCTGAAAAGGCCAGTATTGTTATTTATTGTCACTACCTCCCTGTGCAGGAT
TGGGTAATTTGCGCGCCTGCTGCCTTCTTGGATGTGGTAGCCGTTTCTCAGGCTCCCTCTCCGGAATCGAACCTAATCCTCCGTAC
CCGTTACCACCATGGTAGGCCTATCCTACCATCGAAAGTTGATAGGGCAGAAATTTGAATGAAACATCGCCGGCACGAGGCCATGC
GATTCGTGAAGTTATCATGATTCACCGCAGTCGGGCAGAGCCCGTGGCCCTTTATCTAATAAATACGTCCCTTCCAGAAGTCGGG
ATTTACGCACGTATTAGCTCTAGATTACTACGGGTATCCGAGTAGTAGGTACCATCAAATAAACTATAACTGATTTAATGAGCCATTGC
CAGTTTCACAGTATAAAGCAGTTTATACTTAGACATGCATGTATACTAAACT
```

**Chlorella sp. ZJU0209 18S ribosomal RNA gene, partial sequence**

Sequence ID: [JX097061.1](#) Length: 1770 Number of Matches: 1

Range 1: 31 to 1741 [GenBank](#) [Graphics](#)

[▼ Next Match](#) [▲ Previous Match](#)

| Score           | Expect                                                        | Identities     | Gaps       | Strand     |
|-----------------|---------------------------------------------------------------|----------------|------------|------------|
| 3147 bits(1704) | 0.0                                                           | 1709/1711(99%) | 1/1711(0%) | Plus/Minus |
| Query 6         | ACGACTTCT-CTTCTCTAGGTGGGAGGTTTAAATGAACCTCTGGGGGCGAGAGCGGA     |                |            | 6          |
| Sbjct 1741      | ACGACTTCTCTTCTCTAGGTGGGAGGTTTAAATGAACCTCTGGGGGCGAGAGCGGA      |                |            | 1          |
| Query 65        | CACCGCAACCGCTGGCCAAATCGAACACTTCACCGACACACCAATCGGTAGGAGCGACG   |                |            | 1          |
| Sbjct 1681      | CACCGCAACCGCTGGCCAAATCGAACACTTCACCGACACACCAATCGGTAGGAGCGACG   |                |            | 1          |
| Query 125       | GGGGTGTGTACAAAGGGCAGGGAAGTAATCAACGCAAGCTGATGACTTGGCTTACTAG    |                |            | 1          |
| Sbjct 1621      | GGGGTGTGTACAAAGGGCAGGGAAGTAATCAACGCAAGCTGATGACTTGGCTTACTAG    |                |            | 1          |
| Query 185       | GCATTCTCGTTGAAGATTAAATAATTGCAATAATCTATCCCATCAGATGCAGTTTCAA    |                |            | 2          |
| Sbjct 1561      | GCATTCTCGTTGAAGATTAAATAATTGCAATAATCTATCCCATCAGATGCAGTTTCAA    |                |            | 1          |
| Query 245       | AGATTACCGGGGCTCTCGGCAAGGCTAGGCTCGTTGAATGCATCAGTGTAGCGCGCT     |                |            | 3          |
| Sbjct 1501      | AGATTACCGGGGCTCTCGGCAAGGCTAGGCTCGTTGAATGCATCAGTGTAGCGCGCT     |                |            | 1          |
| Query 305       | CGGGCCAGAACATCTAAGGGCATCACAGACCTGTTATTGCTCATGCTTCCATTGGCTA    |                |            | 3          |
| Sbjct 1441      | CGGGCCAGAACATCTAAGGGCATCACAGACCTGTTATTGCTCATGCTTCCATTGGCTA    |                |            | 1          |
| Query 365       | GTGGCAATAGTCCCTCTAAGAAAGTCCGCGGCTGGCGAGCCAAACCGTACTATTAGCA    |                |            | 4          |
| Sbjct 1381      | GTGGCAATAGTCCCTCTAAGAAAGTCCGCGGCTGGCGAGCCAAACCGTACTATTAGCA    |                |            | 1          |
| Query 425       | GGTGAGGTCTCGTTGTTAOCGGAATCAACCTGACAAAGGCAACCCAACTAAGAACG      |                |            | 4          |
| Sbjct 1321      | GGTGAGGTCTCGTTGTTAOCGGAATCAACCTGACAAAGGCAACCCAACTAAGAACG      |                |            | 1          |
| Query 485       | CCCATGCAACCAACCATAGAATCAAGAAAGAGCTCTCAATCTGCTCAATCTCACTATG    |                |            | 5          |
| Sbjct 1261      | CCCATGCAACCAACCATAGAATCAAGAAAGAGCTCTCAATCTGCTCAATCTCACTATG    |                |            | 1          |
| Query 545       | TCTGGACCTGGTAAGTTTTCOCGTGTTGAGTCAAAATTAAGODGAGGCTCCACGCTGGT   |                |            | 6          |
| Sbjct 1201      | TCTGGACCTGGTAAGTTTTCOCGTGTTGAGTCAAAATTAAGODGAGGCTCCACGCTGGT   |                |            | 1          |
| Query 605       | GGTGOCTTCGTCGAATTCCTTAAAGTTTCAGCCTTGCGACCATCTCCCCCGGAACCC     |                |            | 6          |
| Sbjct 1141      | GGTGOCTTCGTCGAATTCCTTAAAGTTTCAGCCTTGCGACCATCTCCCCCGGAACCC     |                |            | 1          |
| Query 665       | AAAAACTTTGATTTCTCATAAGGTGCGGGGAGTCATOGAAGAAACATCCGCGATCC      |                |            | 7          |
| Sbjct 1081      | AAAAACTTTGATTTCTCATAAGGTGCGGGGAGTCATOGAAGAAACATCCGCGATCC      |                |            | 1          |
| Query 725       | TAGTGGCATCGTTTATGCTGAGACTAGGACGCTATCTAATGCTCTTCGAGCCCCAAC     |                |            | 7          |
| Sbjct 1021      | TAGTGGCATCGTTTATGCTGAGACTAGGACGCTATCTAATGCTCTTCGAGCCCCAAC     |                |            | 9          |
| Query 785       | TTTCGTTCTGATTAATGAAACATCCTTGGCAATGCTTTCGAGTAGTTCCTTTTCA       |                |            | 8          |
| Sbjct 961       | TTTCGTTCTGATTAATGAAACATCCTTGGCAATGCTTTCGAGTAGTTCCTTTTCA       |                |            | 9          |
| Query 845       | TAAATCCAGAAATTTCACTCTGACAATGAAATACGAATGCCCGGACTGTCCCTCTTAA    |                |            | 9          |
| Sbjct 901       | TAAATCCAGAAATTTCACTCTGACAATGAAATACGAATGCCCGGACTGTCCCTCTTAA    |                |            | 8          |
| Query 905       | TCATTACTCGGCTCTACAGAACACAGGATAGGCCAGAGTCTATCGTGTTATTCATG      |                |            | 9          |
| Sbjct 841       | TCATTACTCGGCTCTACAGAACACAGGATAGGCCAGAGTCTATCGTGTTATTCATG      |                |            | 1          |
| Query 965       | CTAATGTATTACAGAGCTAGGCTGCTTTCAACACTCTAATTTACTCAAAGTAACAGGC    |                |            | 7          |
| Sbjct 781       | CTAATGTATTACAGAGCTAGGCTGCTTTCAACACTCTAATTTACTCAAAGTAACAGGC    |                |            | 7          |
| Query 1025      | CGACTCCGAGTCCCGGACAGTGAAGCCAGGAGCCCGTCCCGGCAACAAGTGGGCOCT     |                |            | 1          |
| Sbjct 721       | CGACTCCGAGTCCCGGACAGTGAAGCCAGGAGCCCGTCCCGGCAACAAGTGGGCOCT     |                |            | 6          |
| Query 1085      | GCCAGTGCACACGAAACGGGACCGGACCGGACCGGACCGGAAATCCAACTACGAGCTTT   |                |            | 1          |
| Sbjct 661       | GCCAGTGCACACGAAACGGGACCGGACCGGACCGGACCGGAAATCCAACTACGAGCTTT   |                |            | 6          |
| Query 1145      | TTAAGTGCAGCAACTTAAATATAAGCTATTGGAGCTGGAATTAACGCGCTGCTGGCAAC   |                |            | 1          |
| Sbjct 601       | TTAAGTGCAGCAACTTAAATATAAGCTATTGGAGCTGGAATTAACGCGCTGCTGGCAAC   |                |            | 5          |
| Query 1205      | AGACTTGGCTCCAAATGATCTCGTTAAGGGGTTTACATTGTAATCCAAATTAACA       |                |            | 1          |
| Sbjct 541       | AGACTTGGCTCCAAATGATCTCGTTAAGGGGTTTACATTGTAATCCAAATTAACA       |                |            | 4          |
| Query 1265      | GACCTGAAAGGCGCAGTATTGTTATTTATTTGTCACCTACCTCCCTGTCTCAGGATTGGGT |                |            | 1          |
| Sbjct 481       | GACCTGAAAGGCGCAGTATTGTTATTTATTTGTCACCTACCTCCCTGTCTCAGGATTGGGT |                |            | 4          |
| Query 1325      | AATTTGGCGGCTGCTGCTTCTTGGATGTGGTAGCGTTTCTCAGGCTCCCTCTCCGG      |                |            | 1          |
| Sbjct 421       | AATTTGGCGGCTGCTGCTTCTTGGATGTGGTAGCGTTTCTCAGGCTCCCTCTCCGG      |                |            | 3          |
| Query 1385      | AATGAAACCTAATCTCCCTCAACCGTTACCAACATGGTAGGCTCTATCTCAACATCG     |                |            | 1          |
| Sbjct 361       | AATGAAACCTAATCTCCCTCAACCGTTACCAACATGGTAGGCTCTATCTCAACATCG     |                |            | 3          |
| Query 1445      | AAAGTTGATAGGGCAGAAATTTGAATGAAACATCGCGGCAAGAGGCGATCGGATTCTG    |                |            | 1          |
| Sbjct 301       | AAAGTTGATAGGGCAGAAATTTGAATGAAACATCGCGGCAAGAGGCGATCGGATTCTG    |                |            | 2          |
| Query 1505      | AAGTTATCATGATTCAACCGCAGTGGGCGAGAGCGCGTGGGCTTTTATCTAATAAATA    |                |            | 1          |
| Sbjct 241       | AAGTTATCATGATTCAACCGCAGTGGGCGAGAGCGCGTGGGCTTTTATCTAATAAATA    |                |            | 1          |
